# Supplementary material
Source: HighWire-hosted journal article supplement (https://www.cmajopen.ca/highwire/filestream/81165/field_highwire_adjunct_files/0/2017-0104-1-at.pdf)
Supplement: 2017-0104-1-at.pdf [file 2017-0104-1-at.pdf]

## Appendix 1 (as supplied by the authors): Supplementary data

### Provincial Drug Insurance program formulary listing status for OxyNeo® by province

| Province                           | Listing of OxyNeo®                                                                                                                                                                                                                                                                                                  |
|------------------------------------|---------------------------------------------------------------------------------------------------------------------------------------------------------------------------------------------------------------------------------------------------------------------------------------------------------------------|
| <b>BC</b>                          | Listed for patients covered by the Palliative Care Drug Plan and for other patients on an exceptional basis through PharmaCare's Special Authority process;                                                                                                                                                         |
| <b>Alberta</b>                     | Listed as a regular benefit                                                                                                                                                                                                                                                                                         |
| <b>Saskatchewan</b>                | Listed under the Exception Drug Status (EDS) program for the treatment of pain in palliative and cancer patients.                                                                                                                                                                                                   |
| <b>Manitoba</b>                    | Listed under the Exception Drug Status for the diagnosis of cancer related pain or other chronic pain diagnoses where the patient is unable to tolerate or receive an adequate response to either the regular release dosage forms of oxycodone or the sustained release preparations of morphine or hydromorphone. |
| <b>Ontario</b>                     | Listed for palliative care patients, and under the Exceptional Access Program for the treatment of chronic pain in patients who have experienced intolerance or have failed an adequate trial of at least one other listed long-acting opioid product. OxyNeo 60mg and 80mg are not funded.                         |
| <b>Quebec</b>                      | Listed on the Exceptional Access list when two other opioids are not tolerated, contraindicated or ineffective.                                                                                                                                                                                                     |
| <b>New Brunswick</b>               | Not listed, but reimbursed for patients who were taking OxyContin when it was discontinued.                                                                                                                                                                                                                         |
| <b>Nova Scotia</b>                 | Not listed, but reimbursed for patients who were taking OxyContin when it was discontinued. Accessible for palliative care patients on a case by case basis.                                                                                                                                                        |
| <b>Newfoundland &amp; Labrador</b> | Not listed, but it is reimbursed for patients who were taking OxyContin when it was discontinued.                                                                                                                                                                                                                   |
| <b>PEI</b>                         | Not listed, but reimbursed for patients who were taking OxyContin in the 90 days prior to it being discontinued.                                                                                                                                                                                                    |

## Rate of Long-Acting Opioid Prescribing by drug and province

**eFigure 1: British Columbia Rate of Opioid Dispensing (MEQ per 1000 population), by LA Opioid Type**

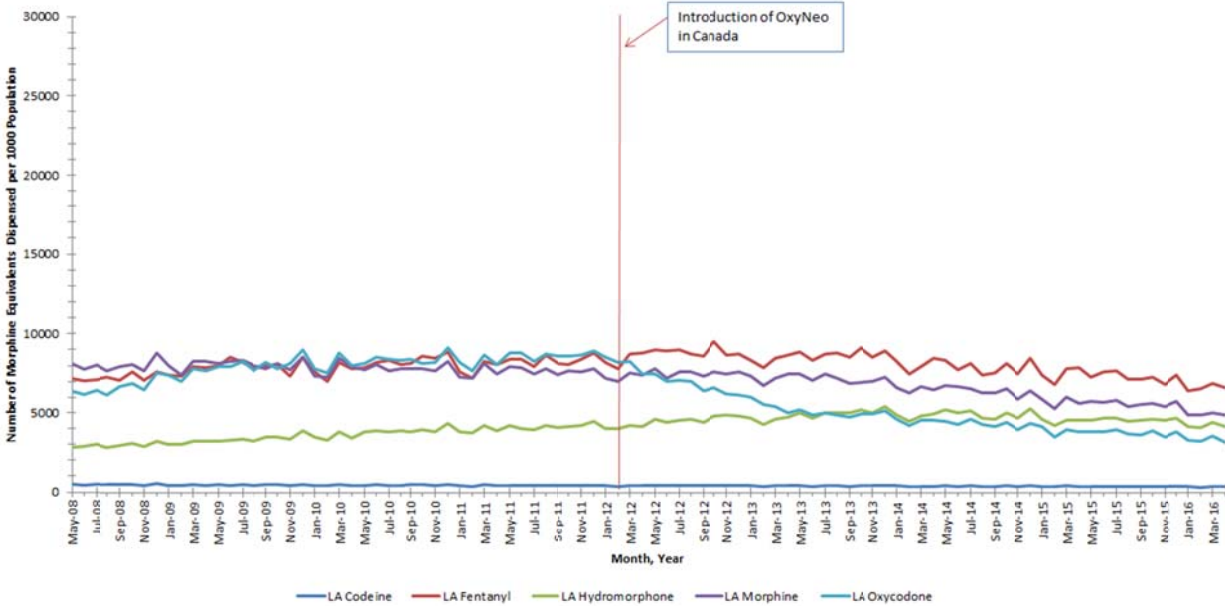

**eFigure 2: Alberta Rate of Opioid Dispensing (MEQ per 1000 population), by LA Opioid Type**

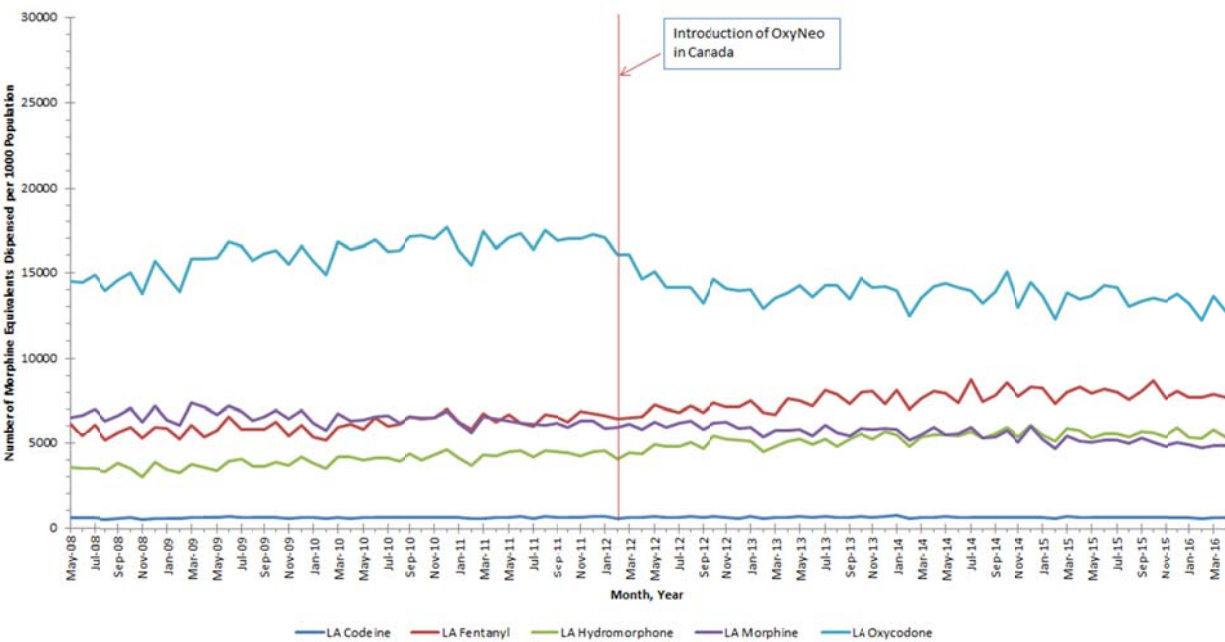

**eFigure 3: Saskatchewan Rate of Opioid Dispensing (MEQ per 1000 population), by LA Opioid Type**

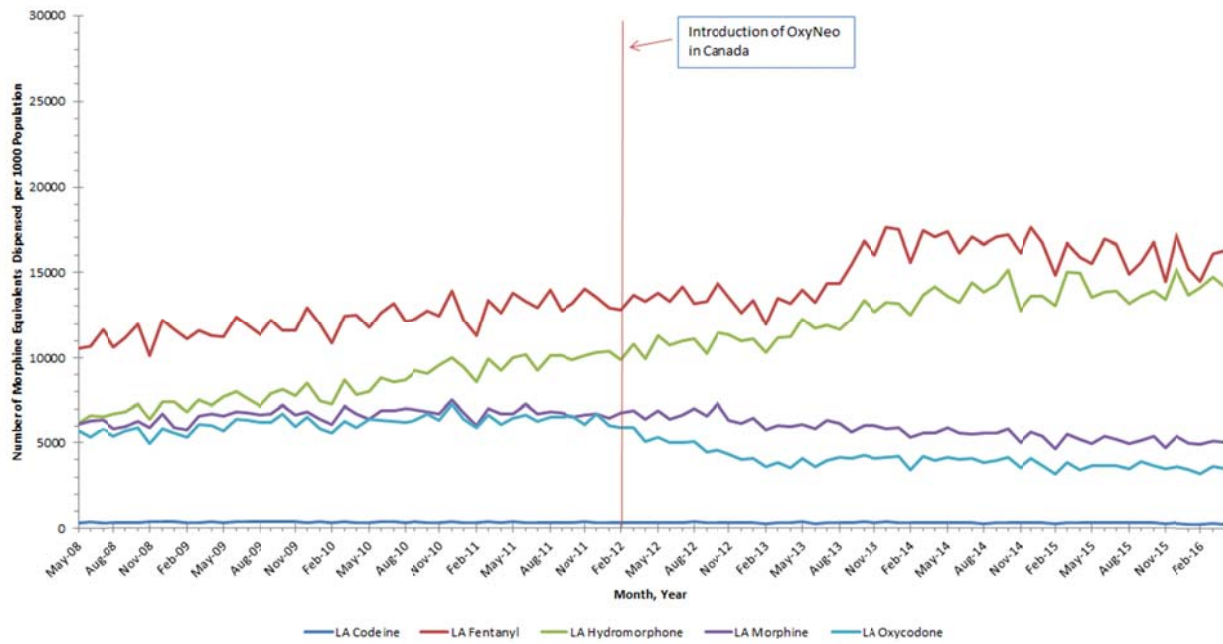

**eFigure 4: Manitoba Rate of Opioid Dispensing (MEQ per 1000 population), by LA Opioid Type**

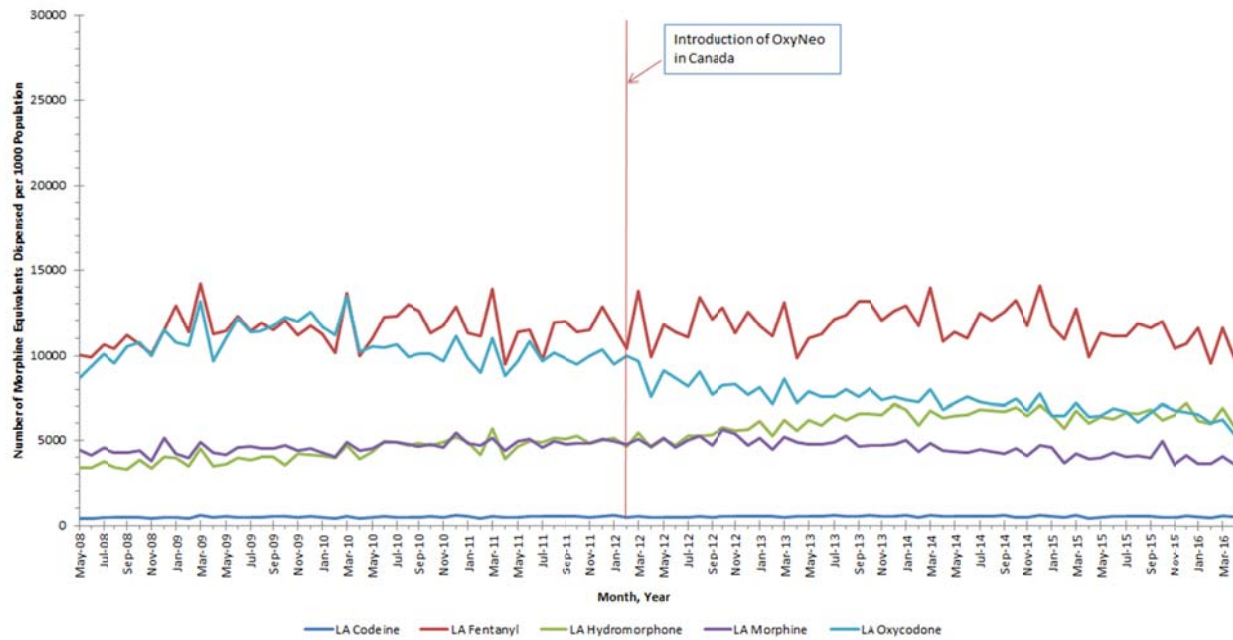

**eFigure 5: Ontario Rate of Opioid Dispensing (MEQ per 1000 population), by LA Opioid Type**

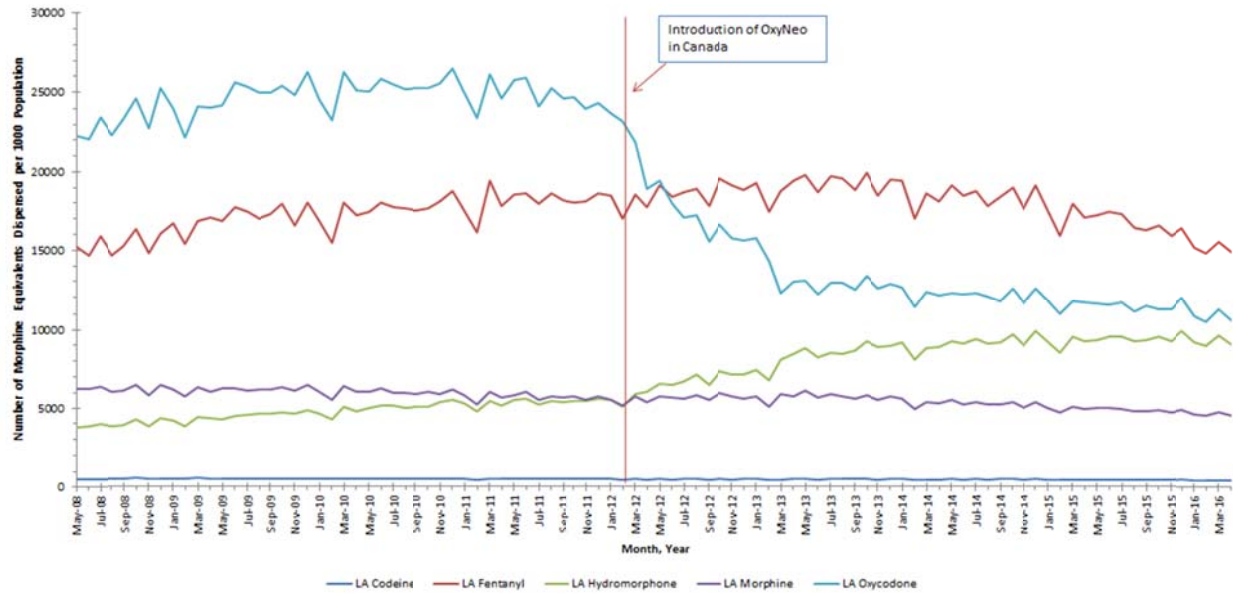

**eFigure 6: Quebec Rate of Opioid Dispensing (MEQ per 1000 population), by LA Opioid Type**

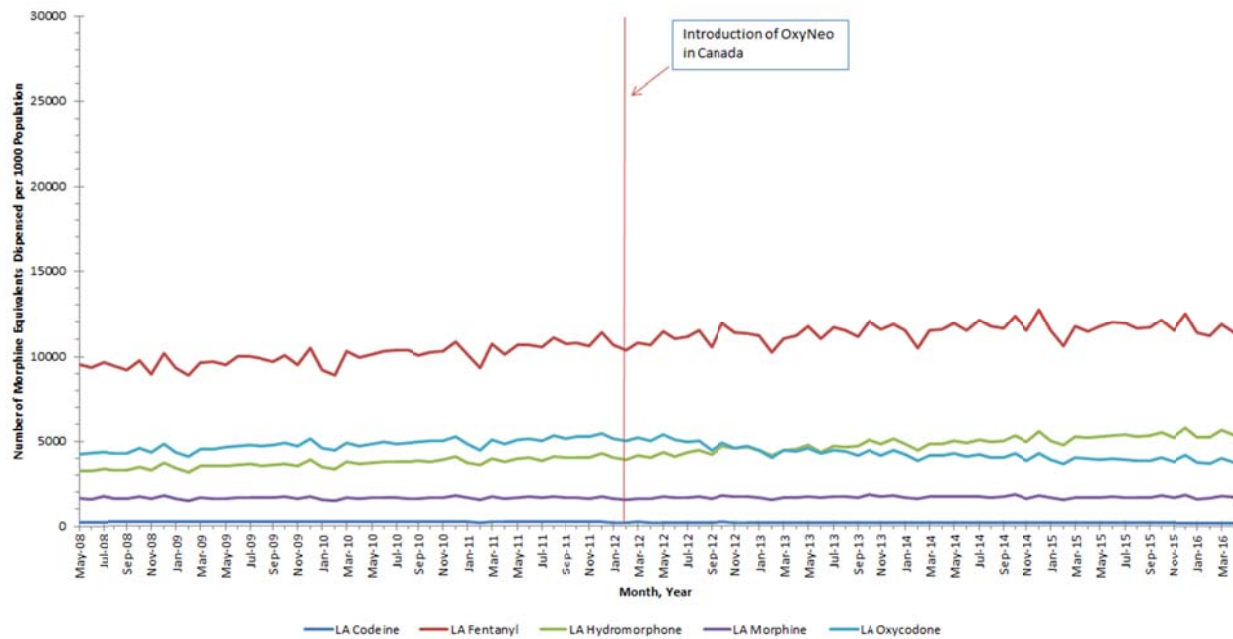

**eFigure 7: New Brunswick Rate of Opioid Dispensing (MEQ per 1000 population), by LA Opioid Type**

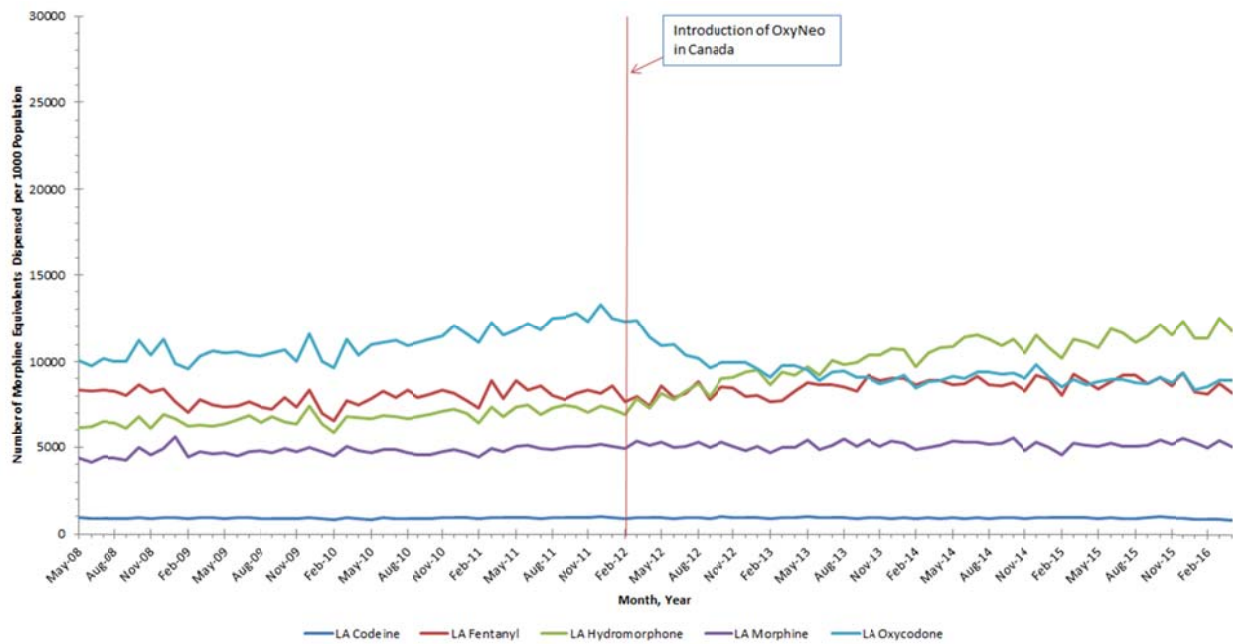

**eFigure 8: Newfoundland & Labrador Rate of Opioid Dispensing (MEQ per 1000 population), by LA Opioid Type**

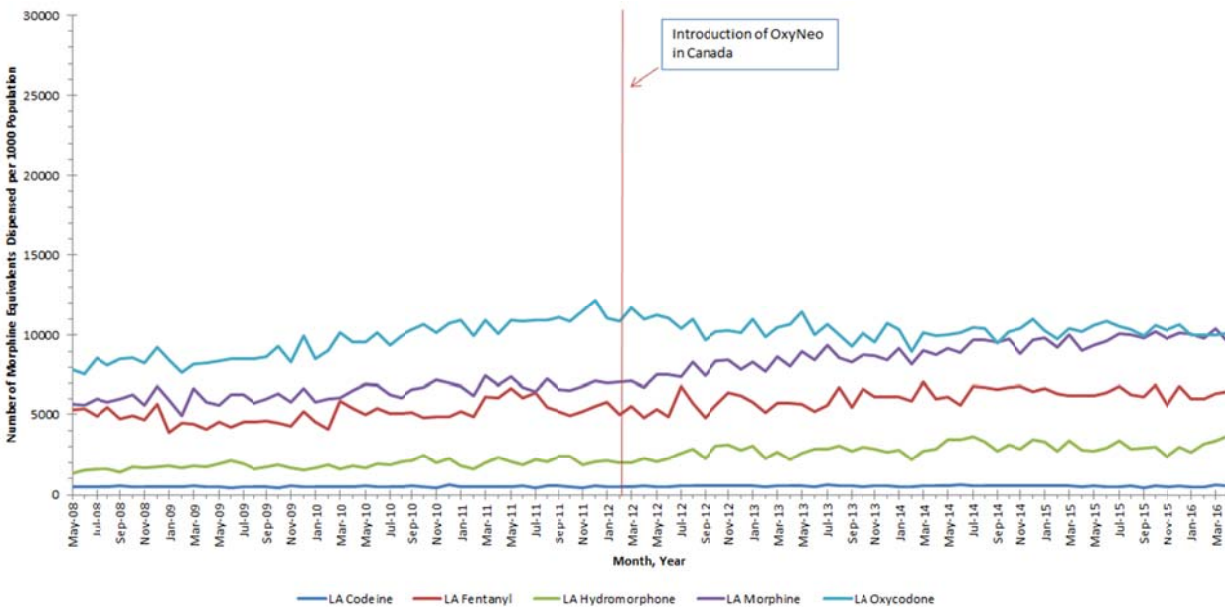

**eFigure 9: Nova Scotia Rate of Opioid Dispensing (MEQ per 1000 population), by LA Opioid Type**

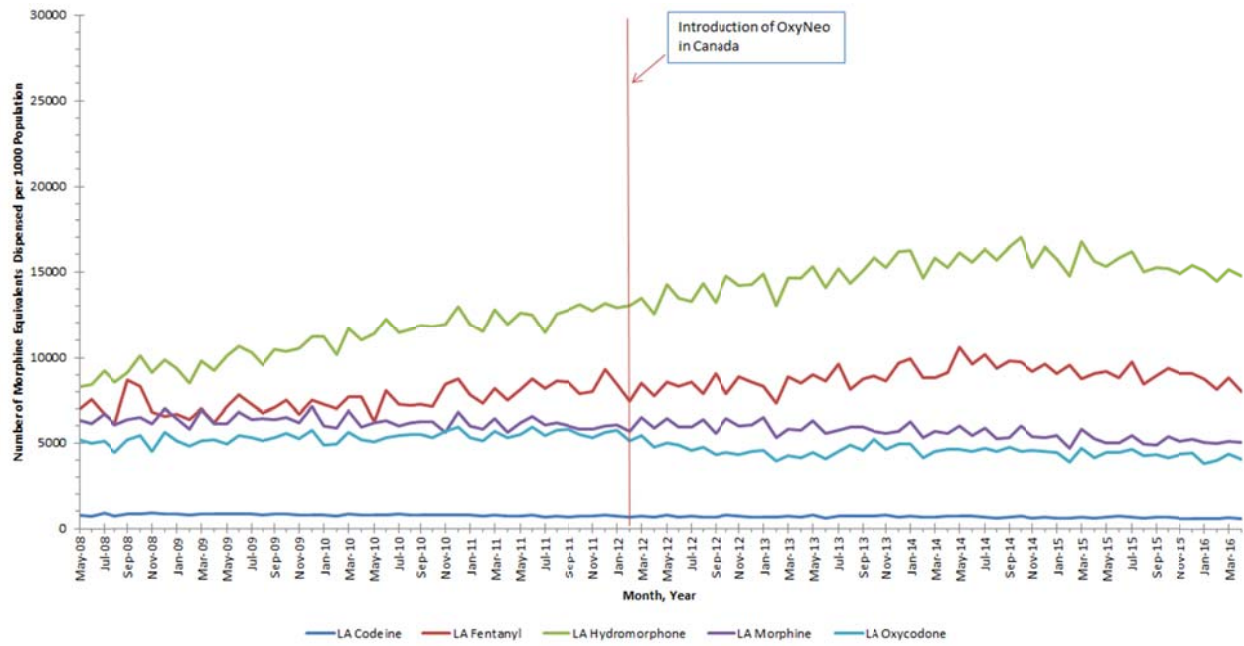

**eFigure 10: Prince Edward Island Rate of Opioid Dispensing (MEQ per 1000 population), by LA Opioid Type**

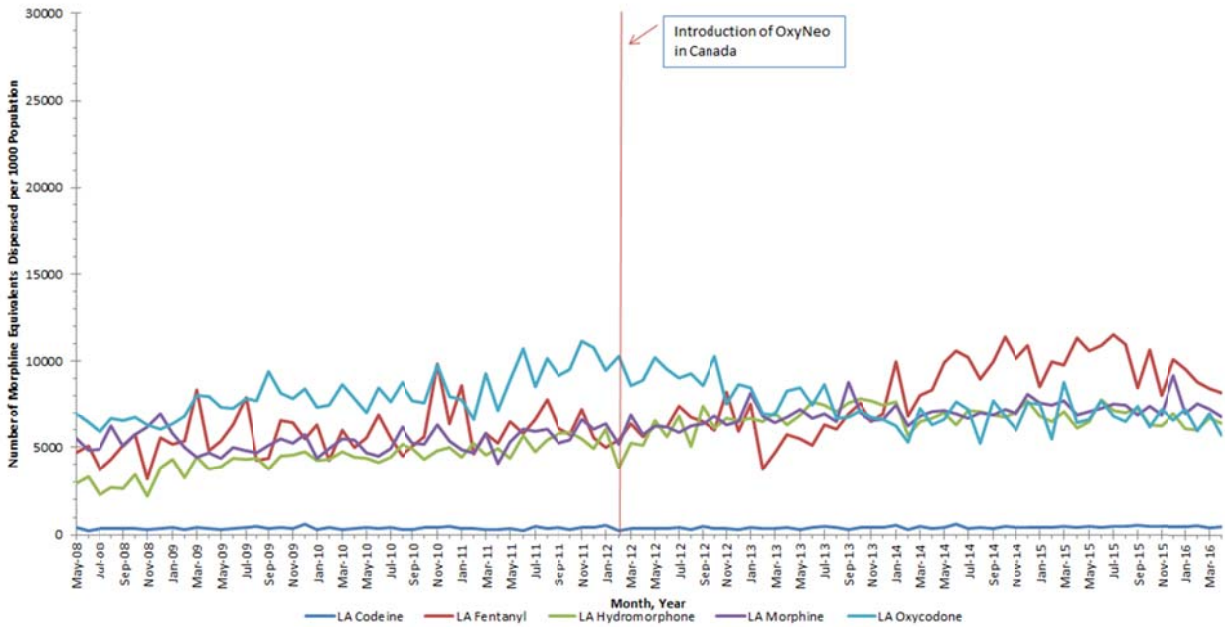

## ARIMA Model Details

### ARIMA Models for Provincial Rate of Long-Acting Opioids

| PROVINCE      | MODEL                                  | Estimate      | P-val           |
|---------------|----------------------------------------|---------------|-----------------|
| <b>ON</b>     | <b>ARIMA( 1 2 3 4)(12) , 1 , 0 )</b>   | <b>-435.5</b> | <b>0.01</b>     |
| AB            | ARIMA( 1 2 3 4)(12) , 1 , 0 )          | -173.2        | 0.1             |
| <b>QC</b>     | <b>ARIMA( 1 2 4 5 6)(12) , 1 , 0 )</b> | <b>-87.5</b>  | <b>&lt;0.01</b> |
| <b>BC</b>     | <b>ARIMA( 1 2 4 5 6)(12) , 1 , 0 )</b> | <b>-253.8</b> | <b>0.01</b>     |
| MN            | ARIMA( 1 2 3 4)(12) , 1 , 0 )          | -74.5         | 0.56            |
| NS            | ARIMA( 1 2 3 4)(12) , 1 , 0 )          | -66.9         | 0.76            |
| <b>NB</b>     | <b>ARIMA( 1 2)(12) , 1 , 0 )</b>       | <b>-220.9</b> | <b>0.05</b>     |
| <b>SK</b>     | <b>ARIMA( 1 2 3 4)(12) , 1 , 0 )</b>   | <b>-253.1</b> | <b>0.01</b>     |
| NL            | ARIMA( 1 2 3 4)(12) , 1 , 0 )          | 51.3          | 0.60            |
| PE            | ARIMA( 1 2 3 4)(12) , 1 , 0 )          | -66.9         | 0.76            |
| <b>CANADA</b> | <b>ARIMA( 1 2 3 4)(12) , 1 , 0 )</b>   | <b>-245.0</b> | <b>&lt;0.01</b> |

### ARIMA Models for Provincial Rate of Immediate-Release Opioids

| PROVINCE | MODEL                     | Estimate | P-val |
|----------|---------------------------|----------|-------|
| ON       | ARIMA( 1 2)(12) , 1 , 0 ) | 86.2     | 0.74  |
| AB       | ARIMA( 1 2)(12) , 1 , 0 ) | 30.0     | 0.69  |
| QC       | ARIMA( 4)(12) , 1 , 0 )   | -3.9     | 0.78  |
| BC       | ARIMA( 4)(12) , 1 , 0 )   | 9.0      | 0.85  |
| MN       | ARIMA( 1 2)(12) , 1 , 0 ) | 35.8     | 0.71  |
| NS       | ARIMA( 1 2)(12) , 1 , 0 ) | 56.6     | 0.42  |
| NB       | ARIMA( 1 2)(12) , 1 , 0 ) | -45.0    | 0.38  |
| SK       | ARIMA( 1 2)(12) , 1 , 0 ) | 7.3      | 0.88  |
| NL       | ARIMA( 1 2)(12) , 1 , 0 ) | 110.5    | 0.16  |
| PE       | ARIMA( 1 2)(12) , 1 , 0 ) | -178.5   | 0.36  |
| CANADA   | ARIMA( 1 2)(12) , 1 , 0 ) | 25.0     | 0.56  |

### ARIMA Models for National Rate of Long-Acting Opioids, by Drug Type

| OPIOID               | MODEL                                | Estimate      | P-val          |
|----------------------|--------------------------------------|---------------|----------------|
| CODEINE              | ARIMA( 1 2 3 4)(12) , 1 , 0 )        | -0.35         | 0.73           |
| FENTANYL             | ARIMA( 1 2 3 4)(12) , 1 , 0 )        | 12.6          | 0.70           |
| <b>HYDROMORPHONE</b> | <b>ARIMA( 1 2 3 4)(12) , 1 , 0 )</b> | <b>76.3</b>   | <b>&lt;.01</b> |
| MORPHINE             | ARIMA( 1 2 3 4)(12) , 1 , 0 )        | 14.5          | 0.09           |
| <b>OXYCODONE</b>     | <b>ARIMA( 1 2 3 4)(12) , 1 , 0 )</b> | <b>-351.9</b> | <b>&lt;.01</b> |
